# Supplementary material
Source: MDPI journal article supplement (https://www.mdpi.com/search?q=diseases-06-00067)
Supplement: s001 [file diseases-06-00067-s001.pdf]

**N2a:** pre-cultured for 24h and treated for 48h with ODN in culture medium without or with 10% FBS

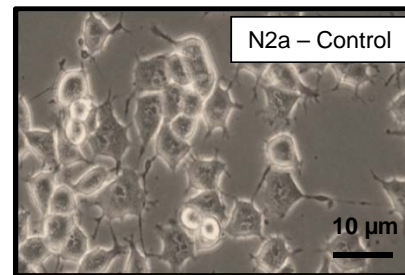

ODN  
48h

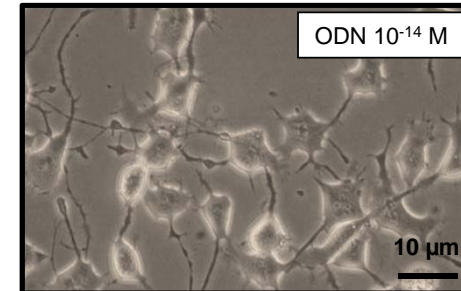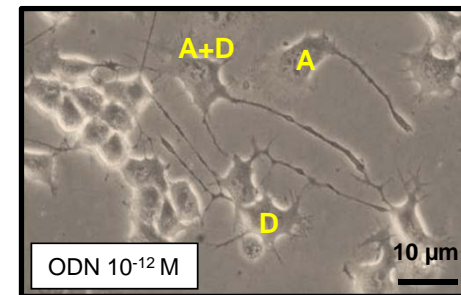

**N2a expressing functional neurotrophins receptors (octadecaneuropeptide (ODN ) receptors) have the ability to differentiate in neurons with dendrites (D), axons (A) and dendrites + axons (D + A)**

**A****0% FBS**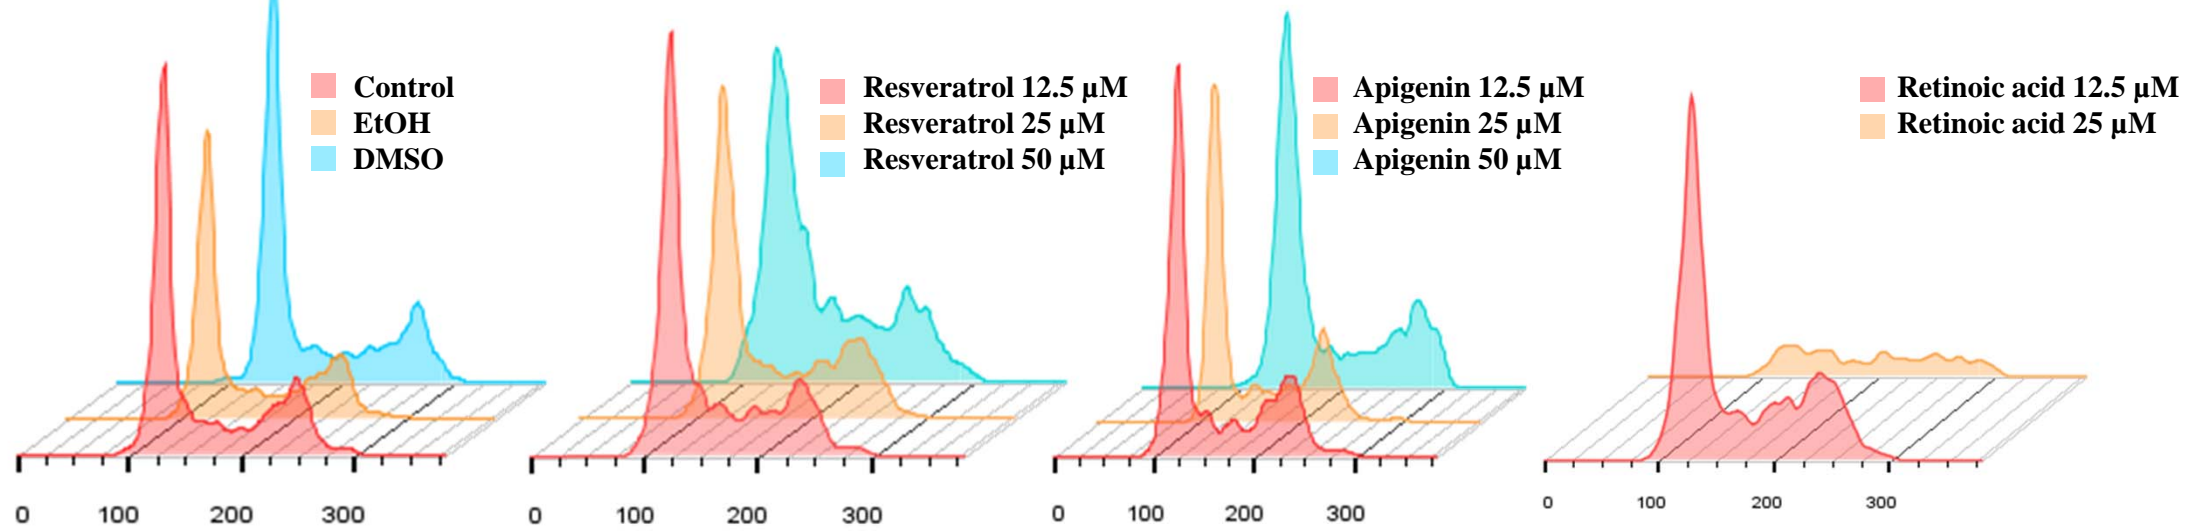**10% FBS**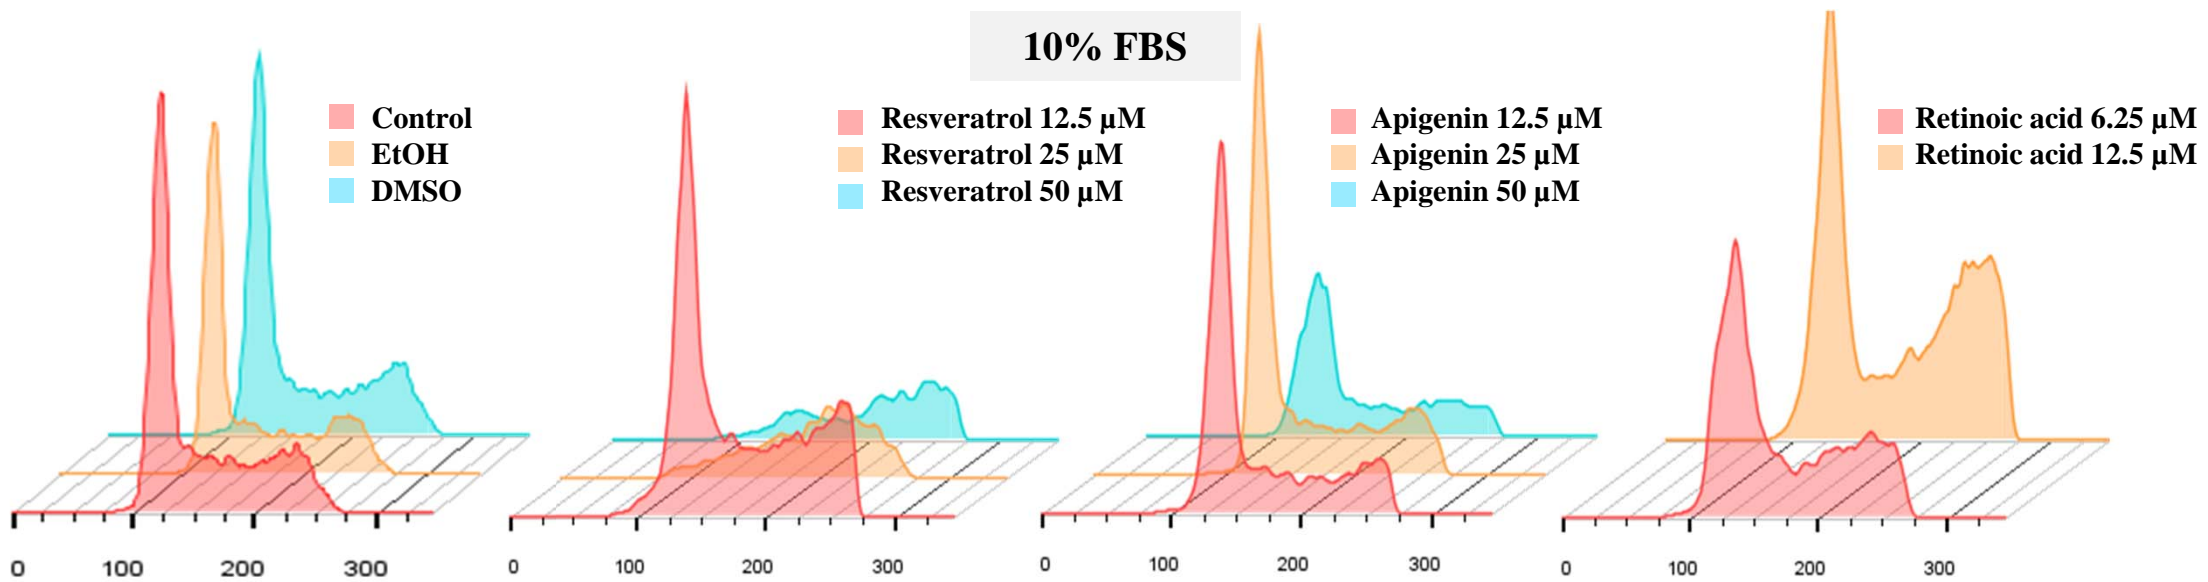

**Repartition of the cells in the different phases of the cell cycle under different conditions of treatments with resveratrol (RSV), apigenin (API) and retinoic acid (RA) in culture medium without Fetal Bovine Serum (0% FBS) or with 10% FBS**

| FBS | Phases of the cell cycle | Treatments |                |                |                  |                |                |                  |                |                |                 |                 |               |
|-----|--------------------------|------------|----------------|----------------|------------------|----------------|----------------|------------------|----------------|----------------|-----------------|-----------------|---------------|
|     |                          | Control    | Vehicle (DMSO) | Vehicle (EtOH) | RSV 12.5 $\mu$ M | RSV 25 $\mu$ M | RSV 50 $\mu$ M | API 12.5 $\mu$ M | API 25 $\mu$ M | API 50 $\mu$ M | RA 6.25 $\mu$ M | RA 12.5 $\mu$ M | RA 25 $\mu$ M |
| 0%  | G0/G1                    | 62         | 60             | 60             | 63               | 52             | 49             | 60               | 56             | 63             | ND              | 47              | 25            |
|     | S                        | 11         | 13             | 17             | 13               | 15             | 23             | 11               | 14             | 12             | ND              | 28              | 27            |
|     | G2 + M                   | 27         | 27             | 23             | 24               | 33             | 28             | 29               | 30             | 25             | ND              | 35              | 48            |
| 10% | G0/G1                    | 60         | 59             | 58             | 46               | 7              | 10             | 55               | 50             | 51             | 48              | 34              | ND            |
|     | S                        | 15         | 19             | 20             | 22               | 65             | 73             | 20               | 27             | 35             | 45              | 14              | ND            |
|     | G2 + M                   | 25         | 22             | 22             | 32               | 28             | 17             | 25               | 23             | 14             | 17              | 52              | ND            |

ND: not determined

**Supplementary Figure 2B, NAMSI et al**

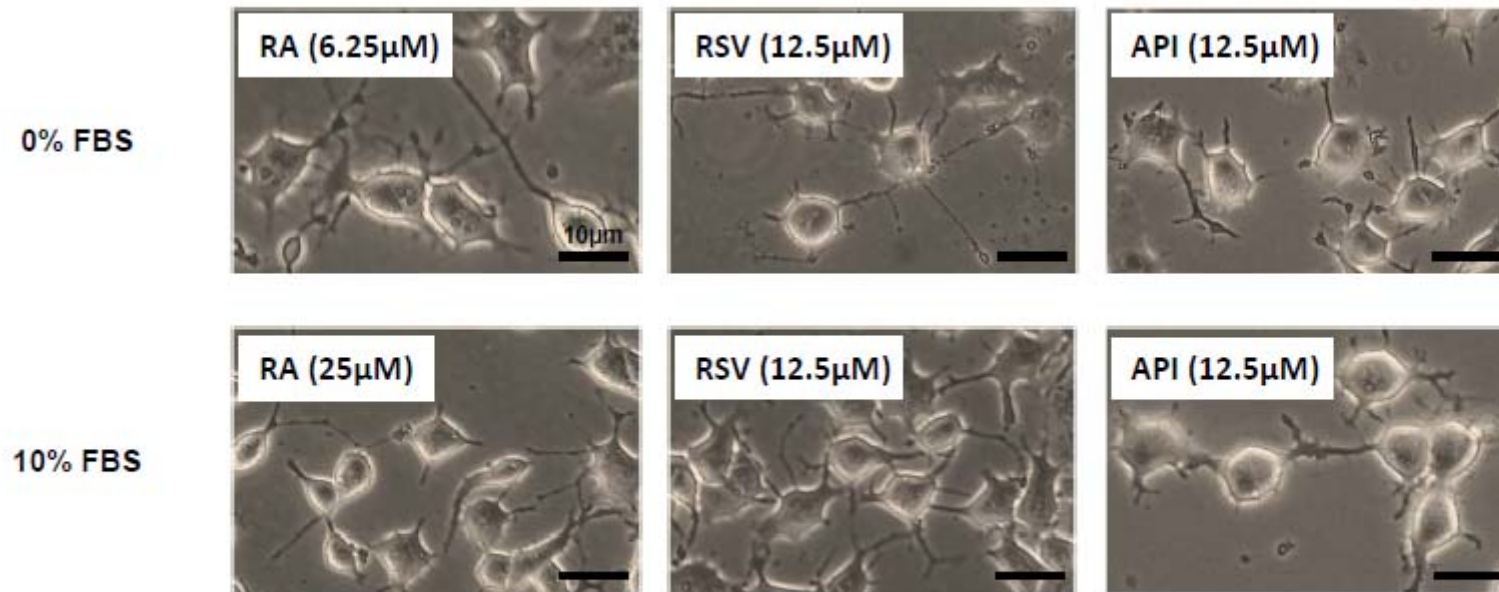

**Supplementary Figure 3, NAMSI et al**
